# Supplementary material
Source: PubMed Central journal article supplement (PMC5716891)

Supplementary Figure 1

A

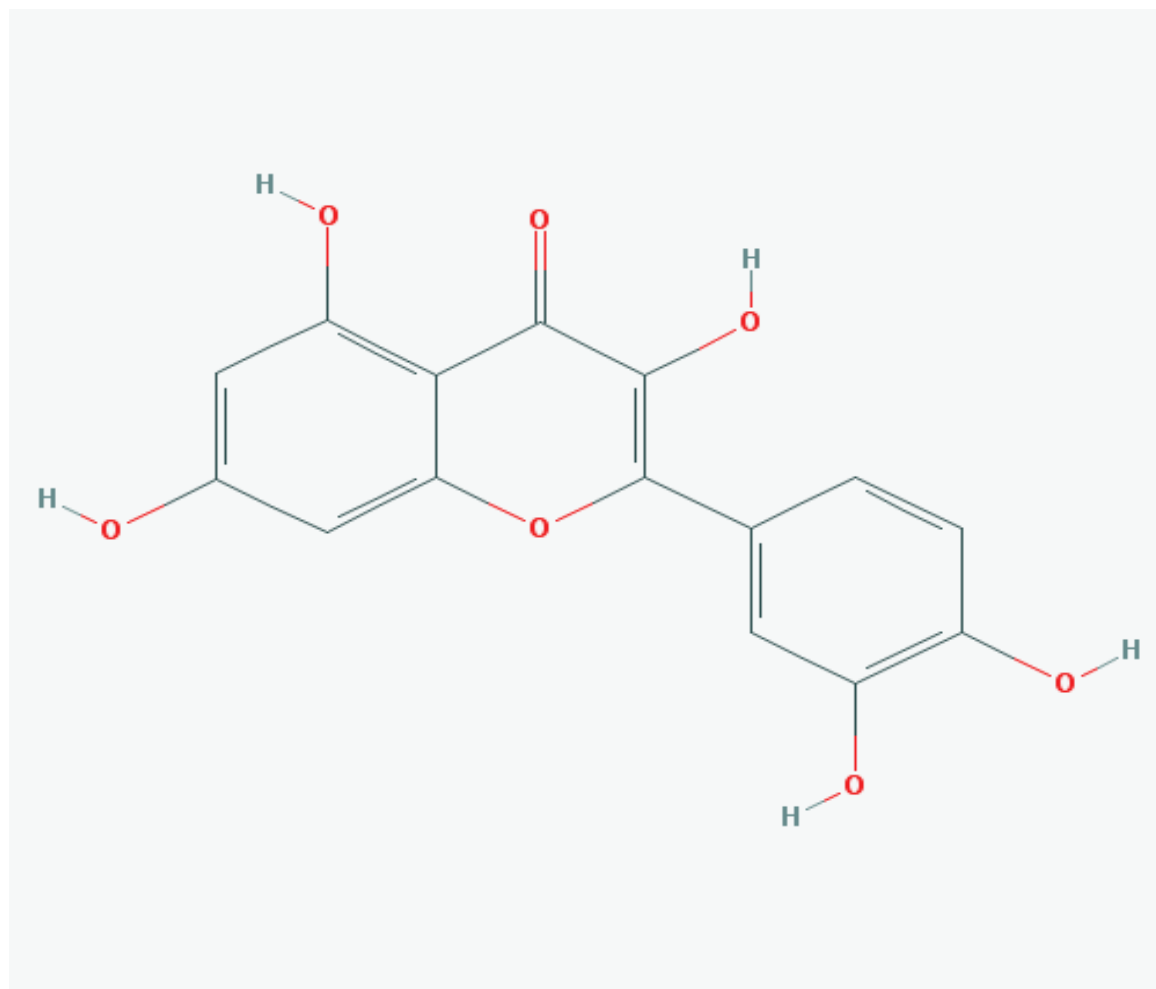

B

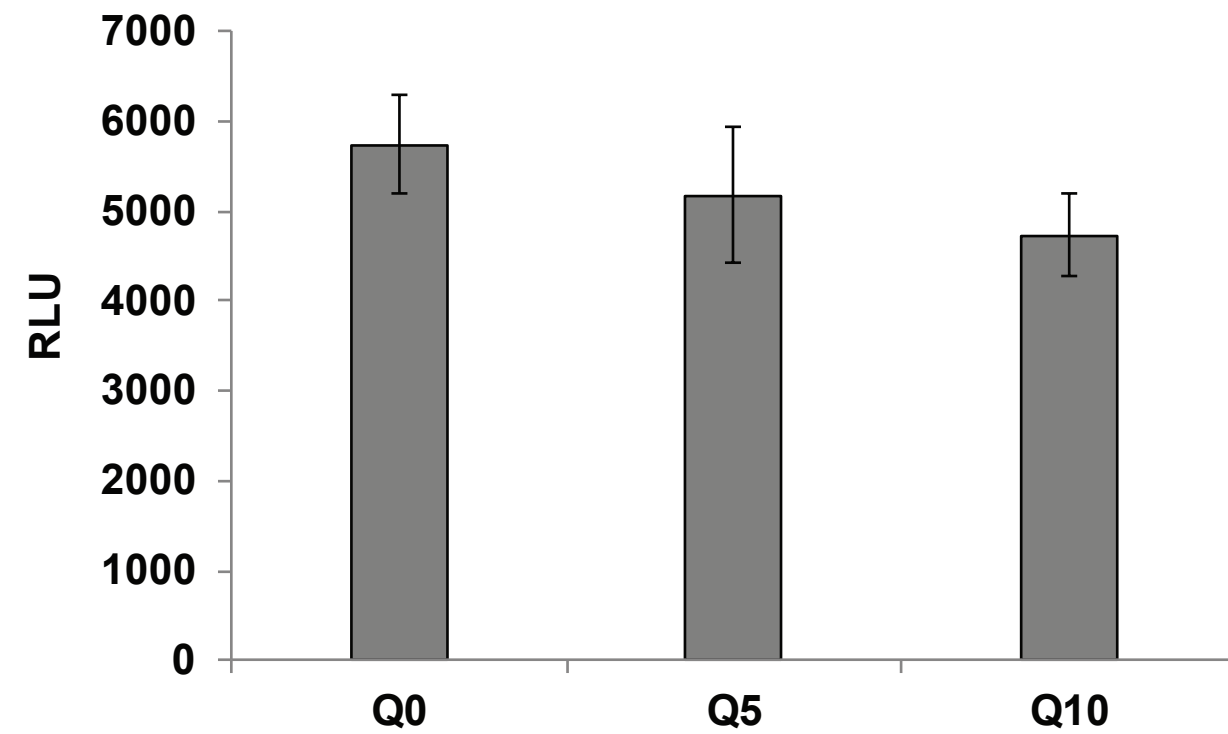

Supplement: NIHMS893285-supplement-1.pdf [file NIHMS893285-supplement-1.pdf]

A

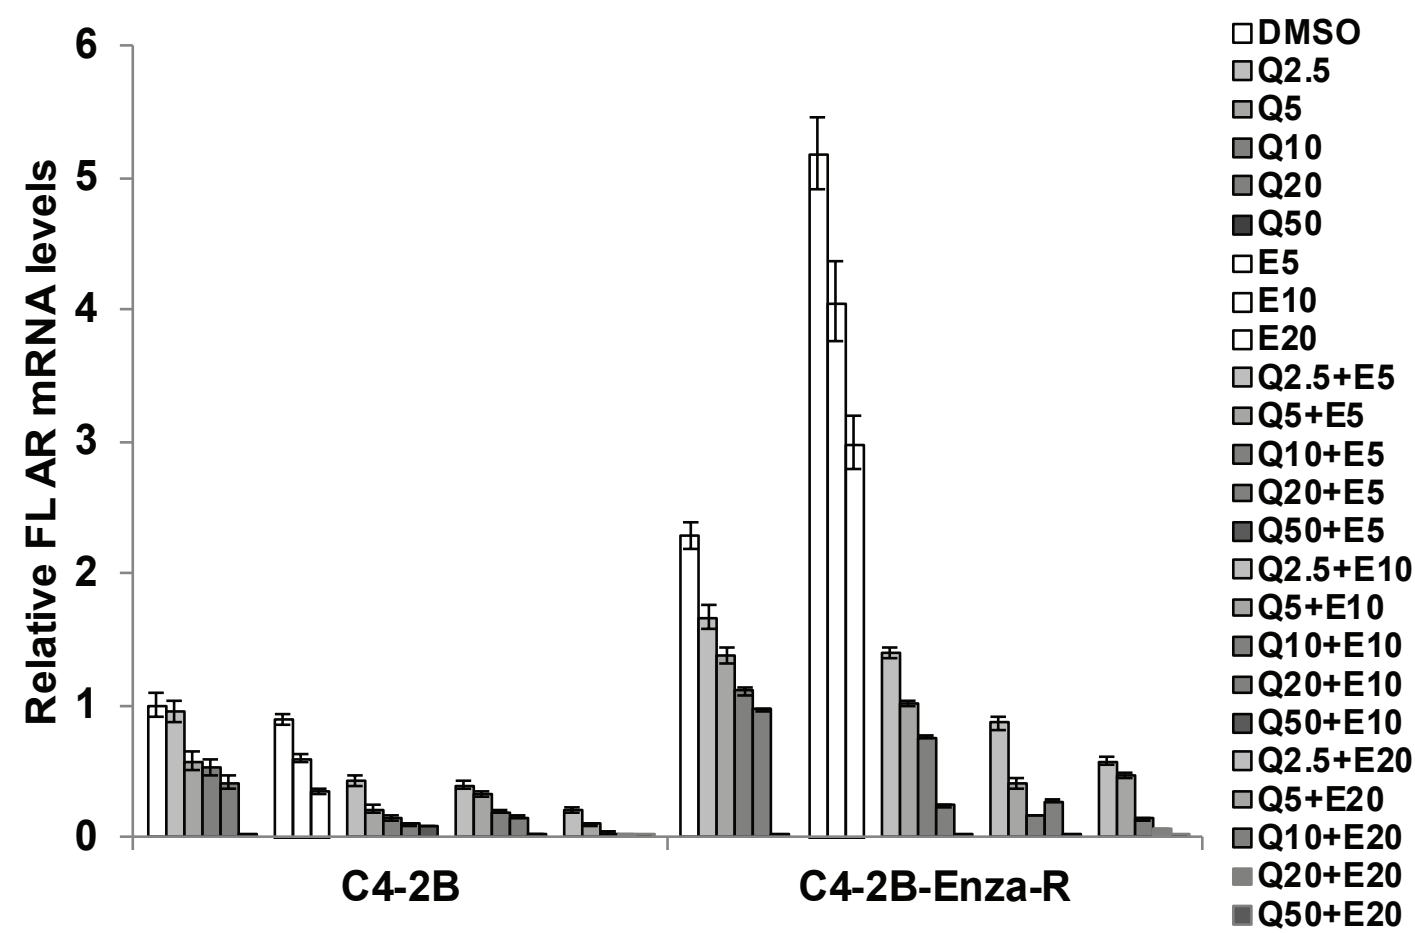

B

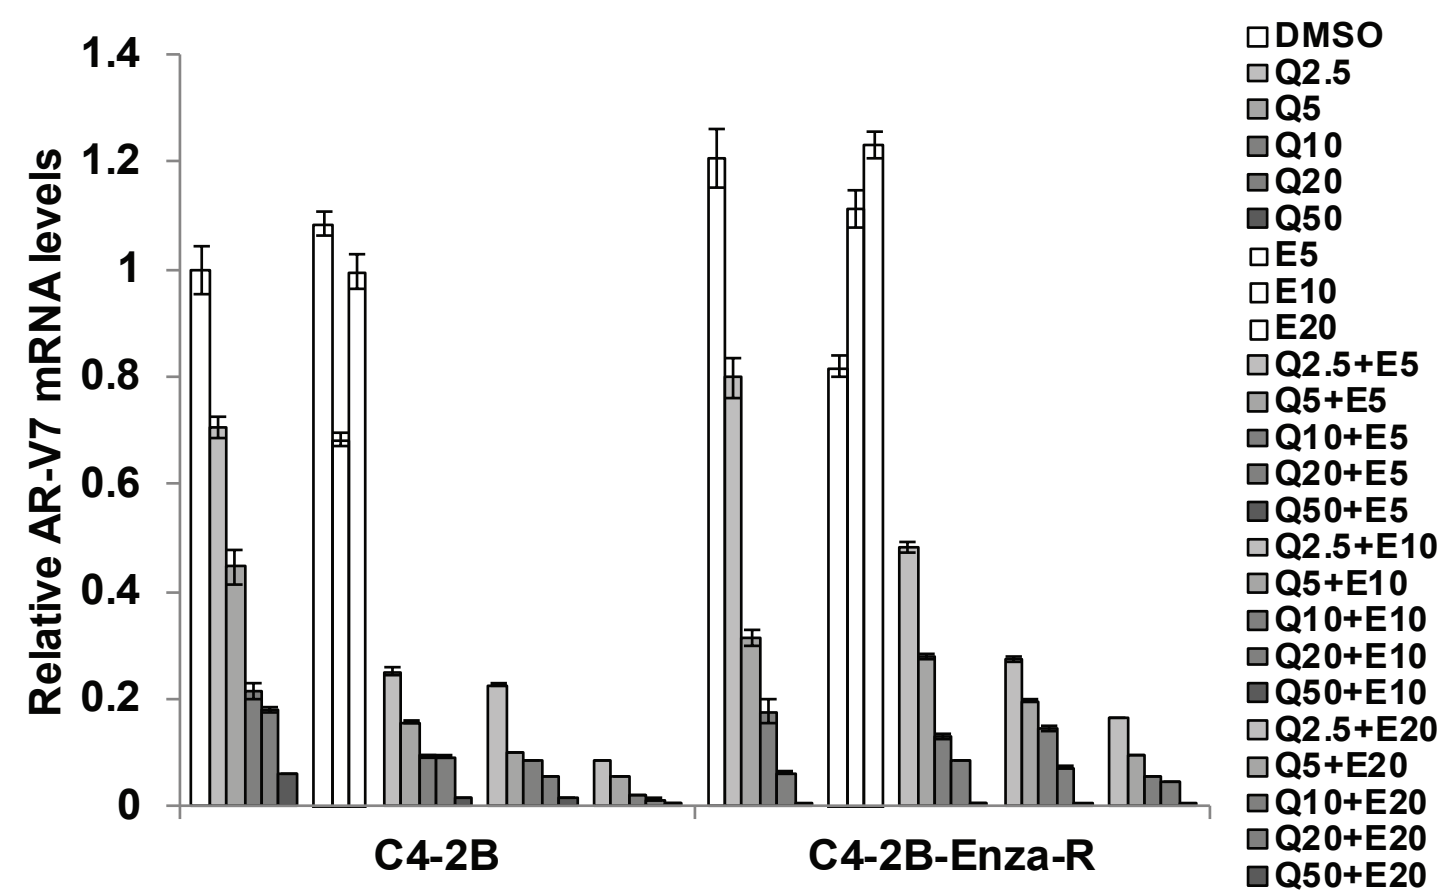

C

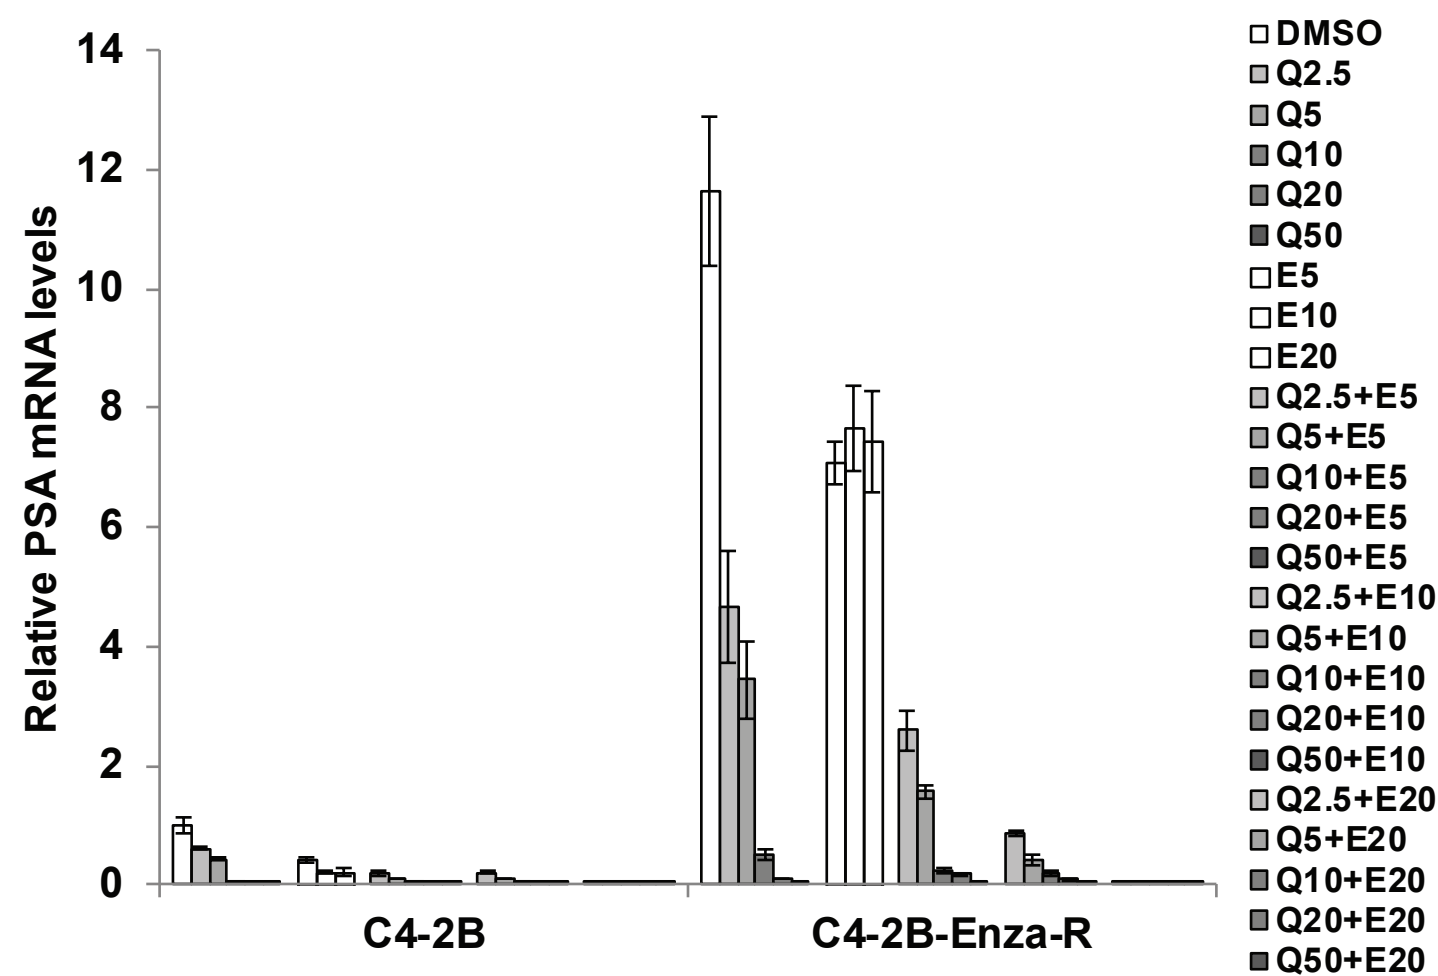

D

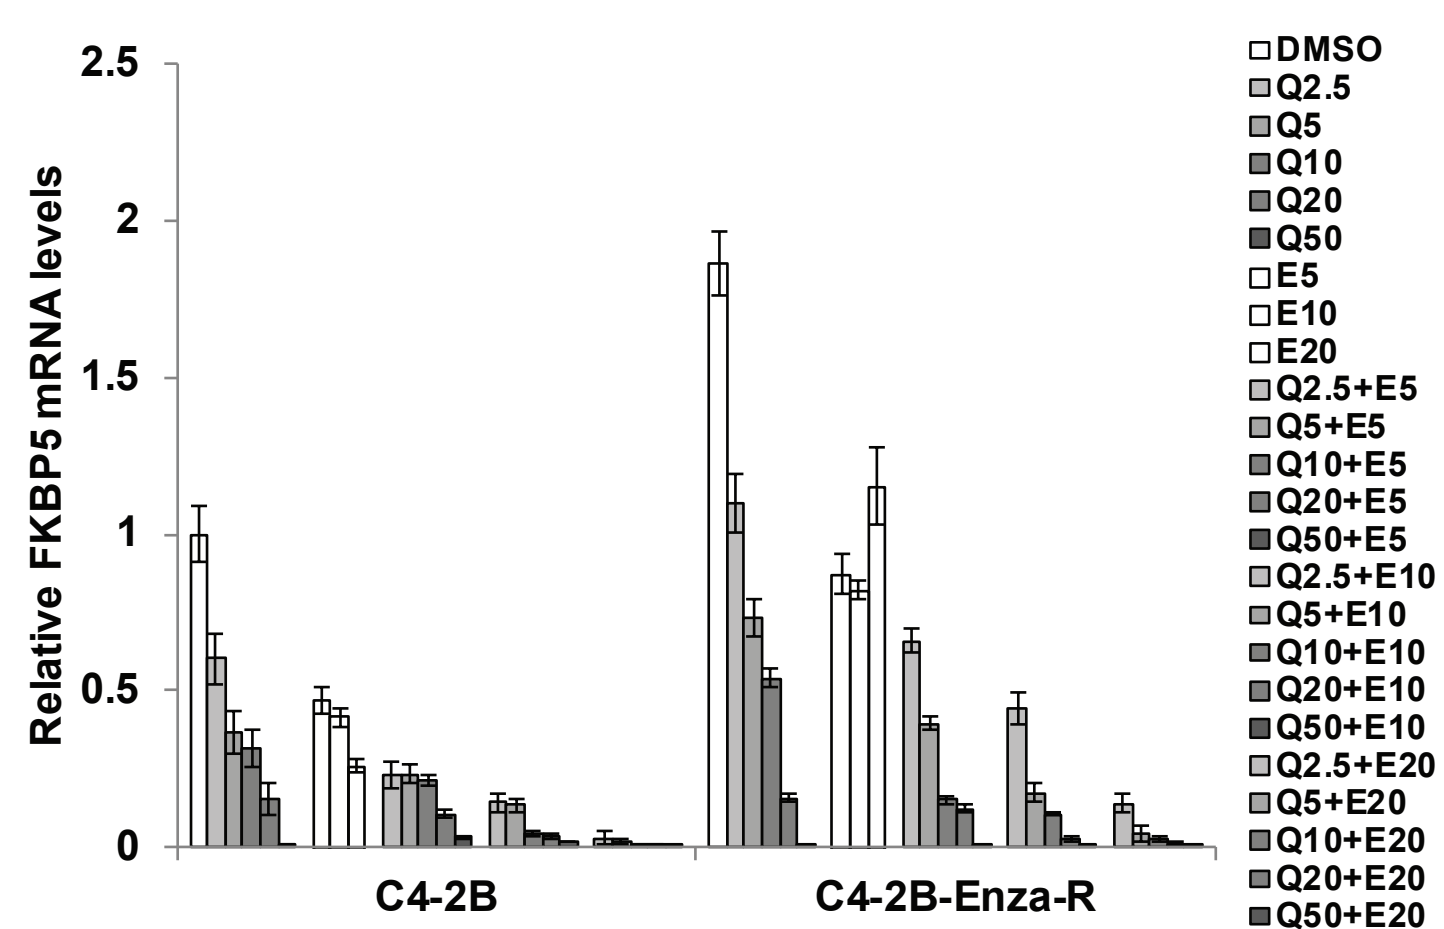

E

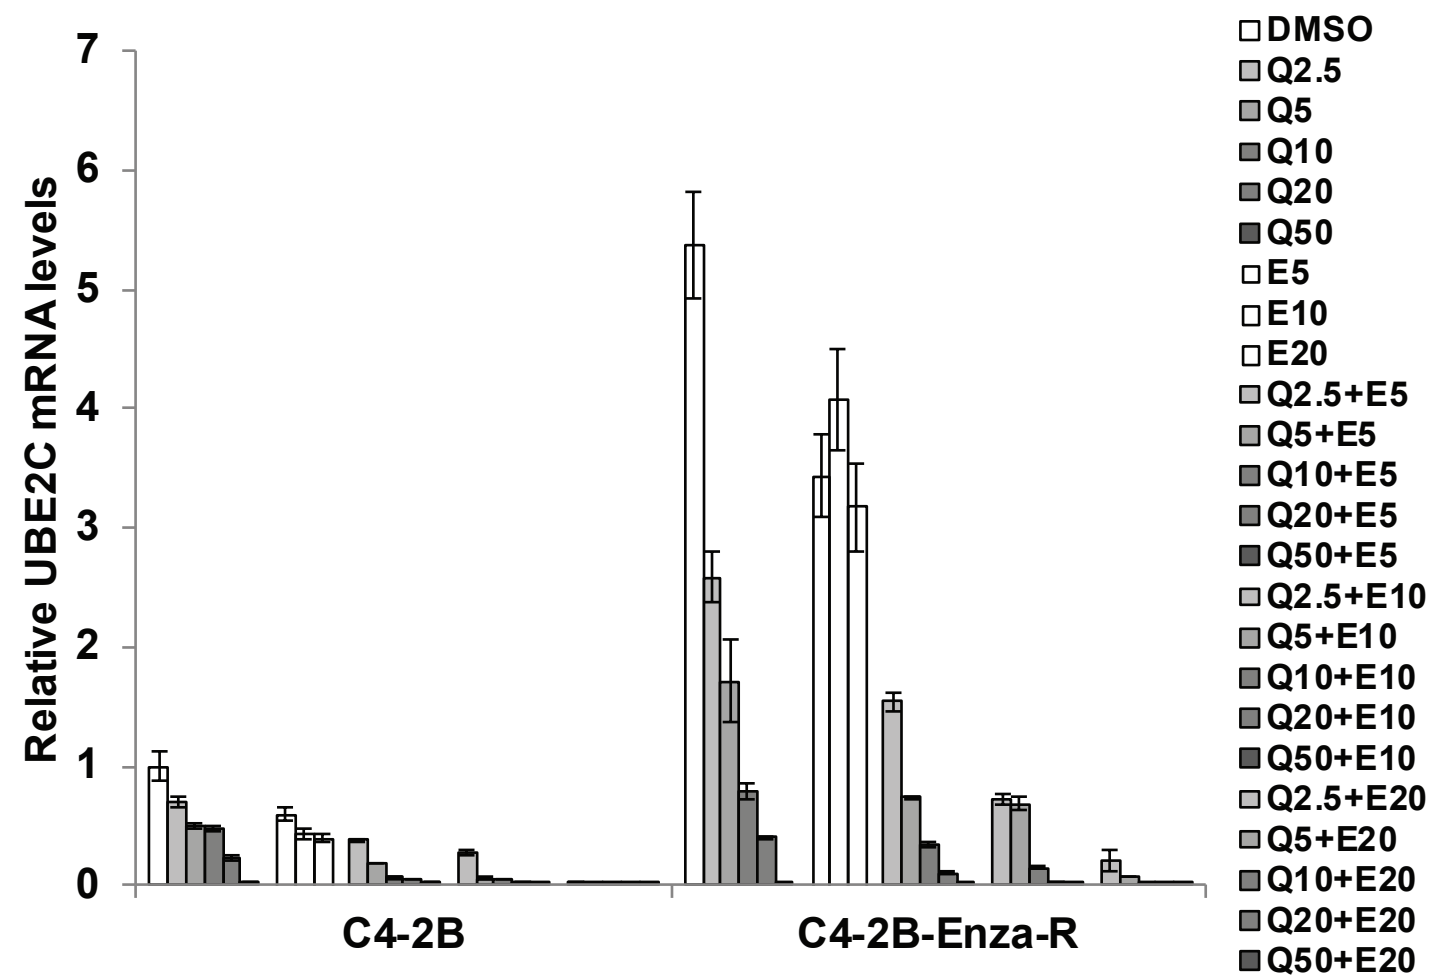

F

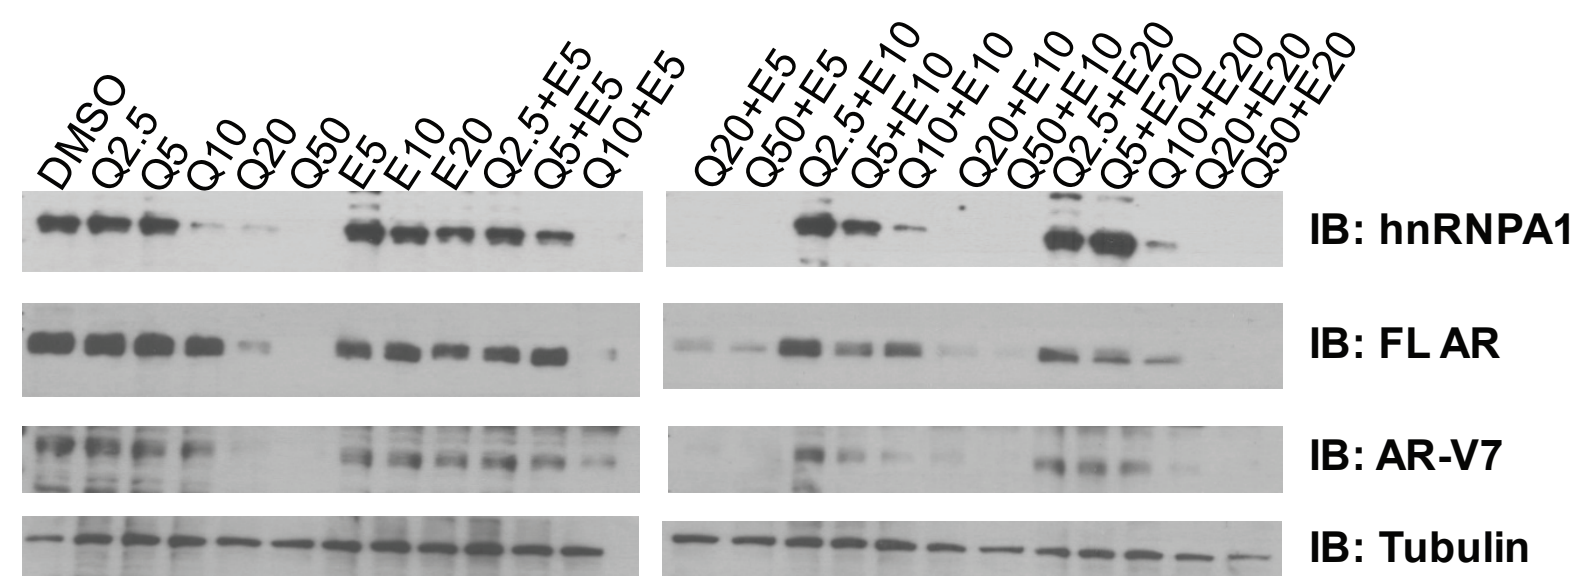

Supplement: NIHMS893285-supplement-2.pdf [file NIHMS893285-supplement-2.pdf]

A

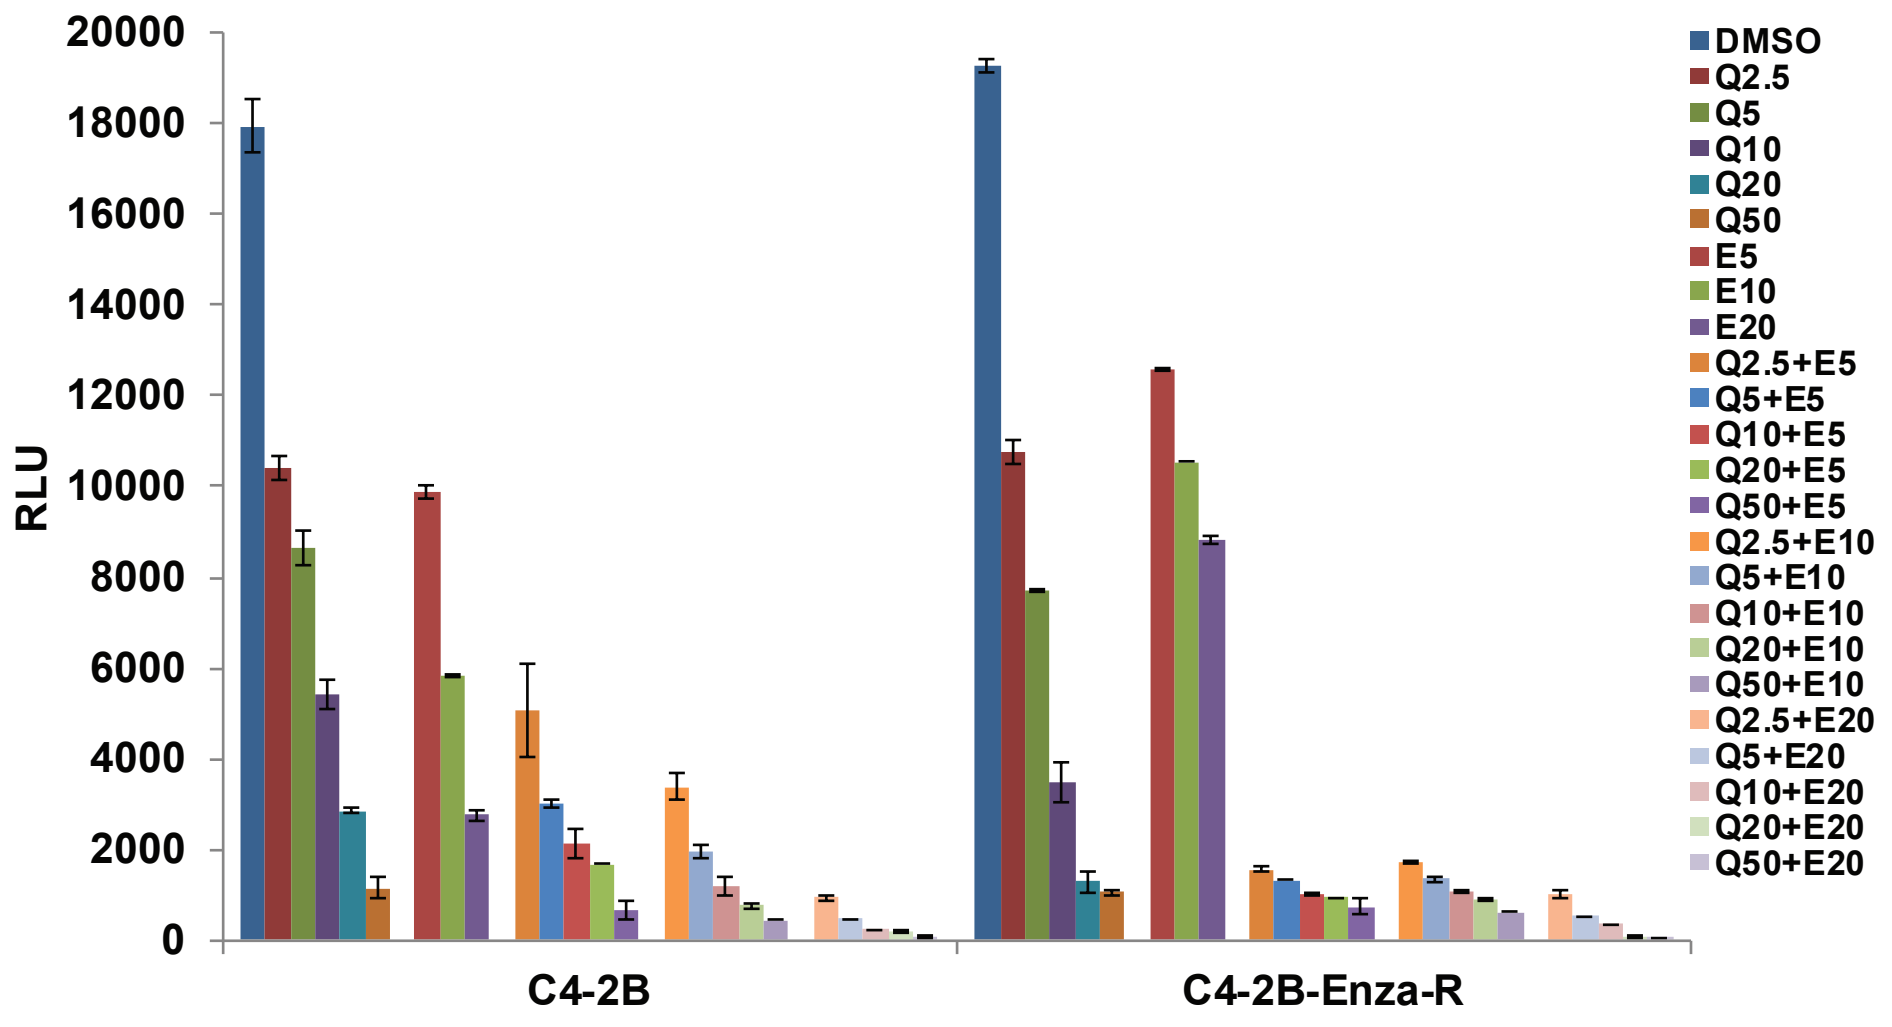

B

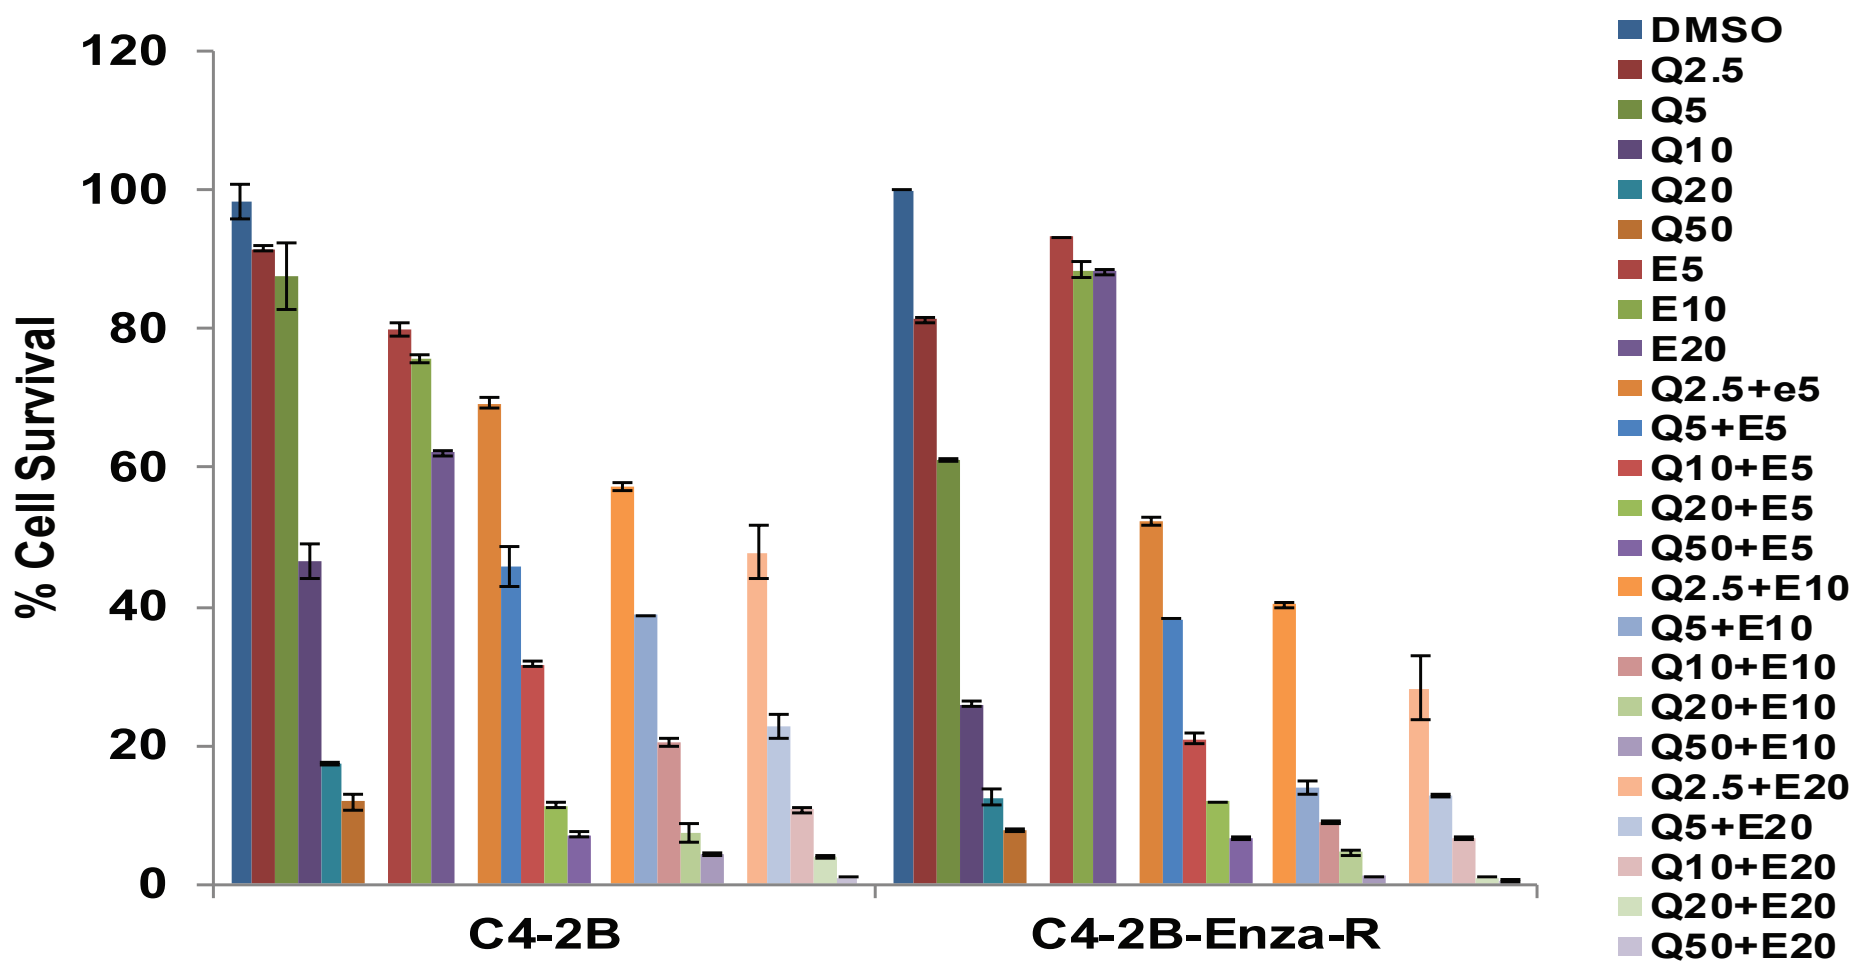

C

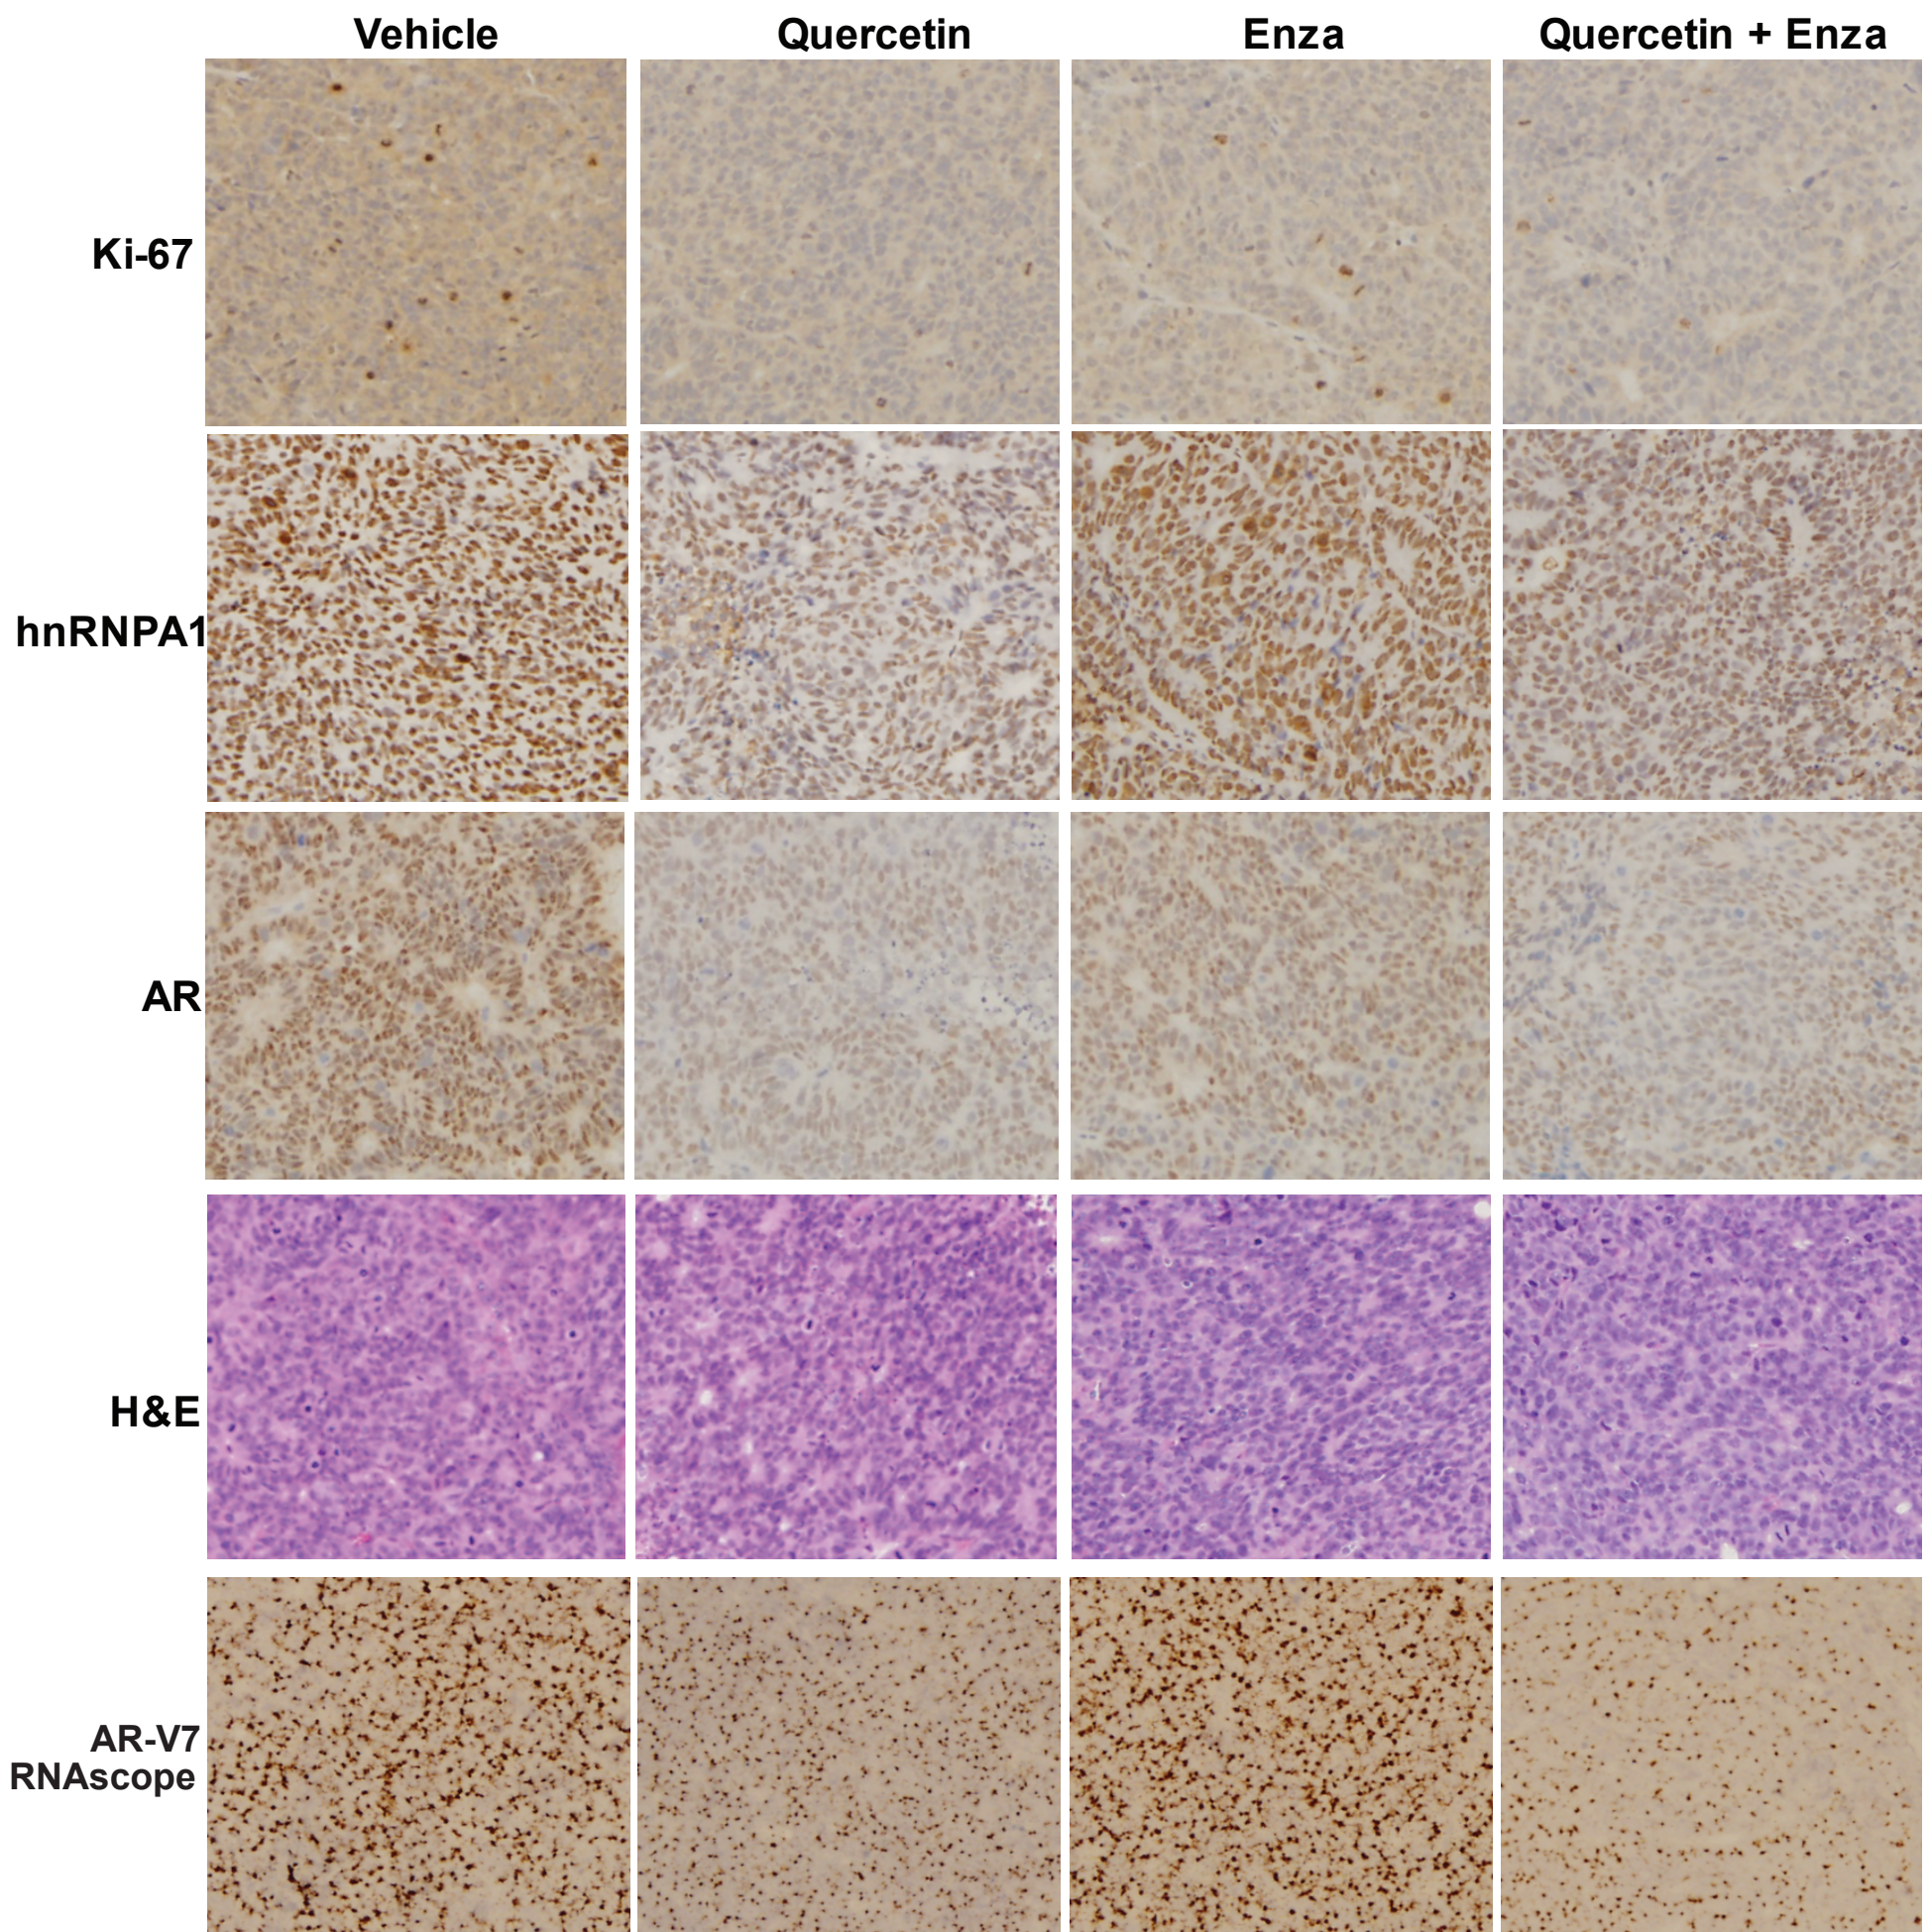

Supplement: NIHMS893285-supplement-3.pdf [file NIHMS893285-supplement-3.pdf]
